# Supplementary material for: Enhanced electroreduction of CO2 by Ni–N–C catalysts from the interplay between valency and local coordination symmetry
Source: Royal Society of Chemistry journal article supplement (doi:10.1039/d2ta05844h), 2022-01-01
Supplement: d2ta05844h1.pdf [file d2ta05844h1.pdf]

## Supporting Information

# Enhanced Electroreduction of CO<sub>2</sub> by Ni–N–C Catalysts from the Interplay Between Valency and Local Coordination Symmetry

*Dongyup Shin,<sup>a</sup> Hansol Choi,<sup>b</sup> Jihun An,<sup>a</sup> Chang Ho Sohn,<sup>c,d</sup> Chang-Hyuck Choi,<sup>c</sup> Hyeyoung Shin,<sup>\*f</sup> and Hyungjun Kim<sup>\*a</sup>*

<sup>a</sup>Department of Chemistry, Korea Advanced Institute of Science and Technology, Daejeon 34141, Republic of Korea.

<sup>b</sup>School of Materials Science and Engineering, Gwangju Institute of Science and Technology, Gwangju 61005, Republic of Korea.

<sup>c</sup>Department of Chemistry, Pohang University of Science and Technology, Pohang 37673, Republic of Korea.

<sup>d</sup>Graduate Program of Nano Biomedical Engineering (NanoBME), Advanced Science Institute, Yonsei University, Seoul, 03722, Republic of Korea.

<sup>e</sup>Department of Chemistry, Pohang University of Science and Technology, Pohang 37673, Republic of Korea

<sup>f</sup>Graduate School of Energy Science and Technology (GEST), Chungnam National University, Daejeon 34134, Republic of Korea.

\*Corresponding authors: (H. Kim) [linus16@kaist.ac.kr](mailto:linus16@kaist.ac.kr) (H. Shin) [shinhy@cnu.ac.kr](mailto:shinhy@cnu.ac.kr)

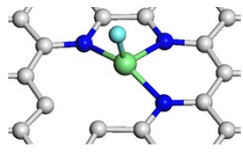

$$\Delta E_b(\text{Ni-H}) = 1.26\text{eV}$$

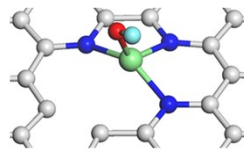

$$\Delta E_b(\text{Ni-OH}) = 0.53\text{eV}$$

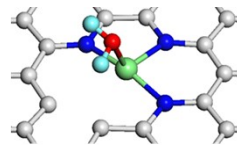

$$\Delta E_b(\text{Ni-H}_2\text{O}) = -0.12\text{eV}$$

**Fig. S1** DFT-calculated structures and energies of H, OH, and H<sub>2</sub>O adsorbed Ni-N<sub>3</sub>V system.

The grey, blue, red, light-green and cyan spheres represent carbon, nitrogen, oxygen, nickel and hydrogen atoms, respectively. The adsorption energy ( $\Delta E_{ads}$ ) of each adsorbate are computed as the following steps:  $\Delta E_{ads,H} = E(\text{H-Ni-N}_3\text{V}) - E(\text{Ni-N}_3\text{V}) - 1/2E(\text{H}_2)$ ,  $\Delta E_{ads,OH} = E(\text{OH-Ni-N}_3\text{V}) - E(\text{Ni-N}_3\text{V}) - E(\text{H}_2\text{O}) + 1/2E(\text{H}_2)$ , and  $\Delta E_{ads,H_2O} = E(\text{H}_2\text{O-Ni-N}_3\text{V}) - E(\text{Ni-N}_3\text{V}) - E(\text{H}_2\text{O})$ . Note that the  $\Delta E_{ads}$  does not include an entropic contribution. For example, a dramatic entropic cost is expected for the binding of liquid water ( $S_{\text{wat(liquid)}} = 69.9 \text{ J K}^{-1} \text{ mol}^{-1}$ , converting into the free energy cost of 0.22 eV at 300K).

**Comment [□]:** C-H 계산 데이터 논의 후 수정 필요. 일단은 리뷰어2의 3번째 질문 답을 복붙해두었음.

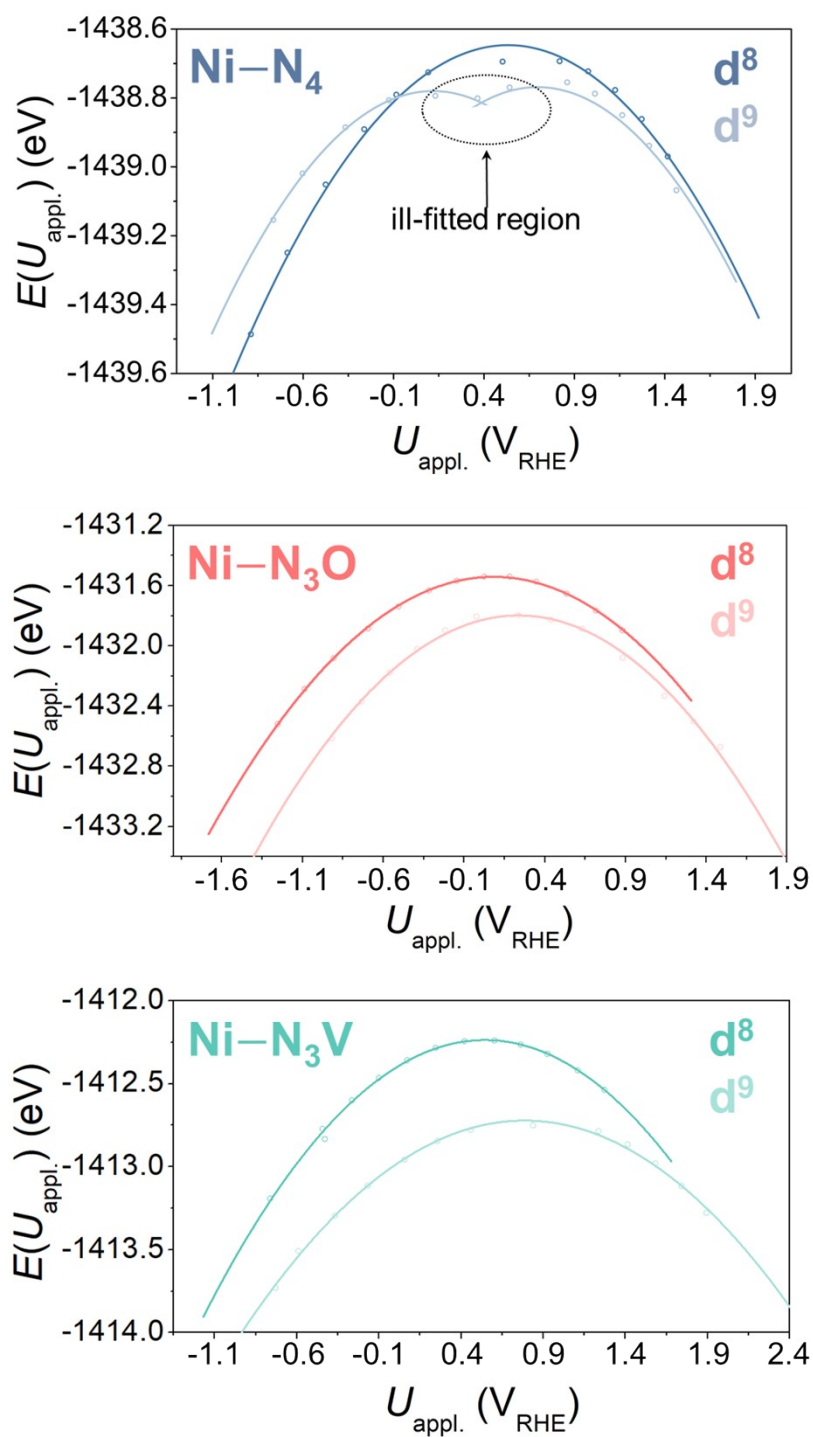

**Fig. S2** Grand-canonical energy profiles versus RHE (pH = 6.8) of Ni-N<sub>4</sub>, Ni-N<sub>3</sub>O, and Ni-N<sub>3</sub>V systems with two different Ni oxidation states—Ni<sup>2+</sup> and Ni<sup>1+</sup>—are compared.

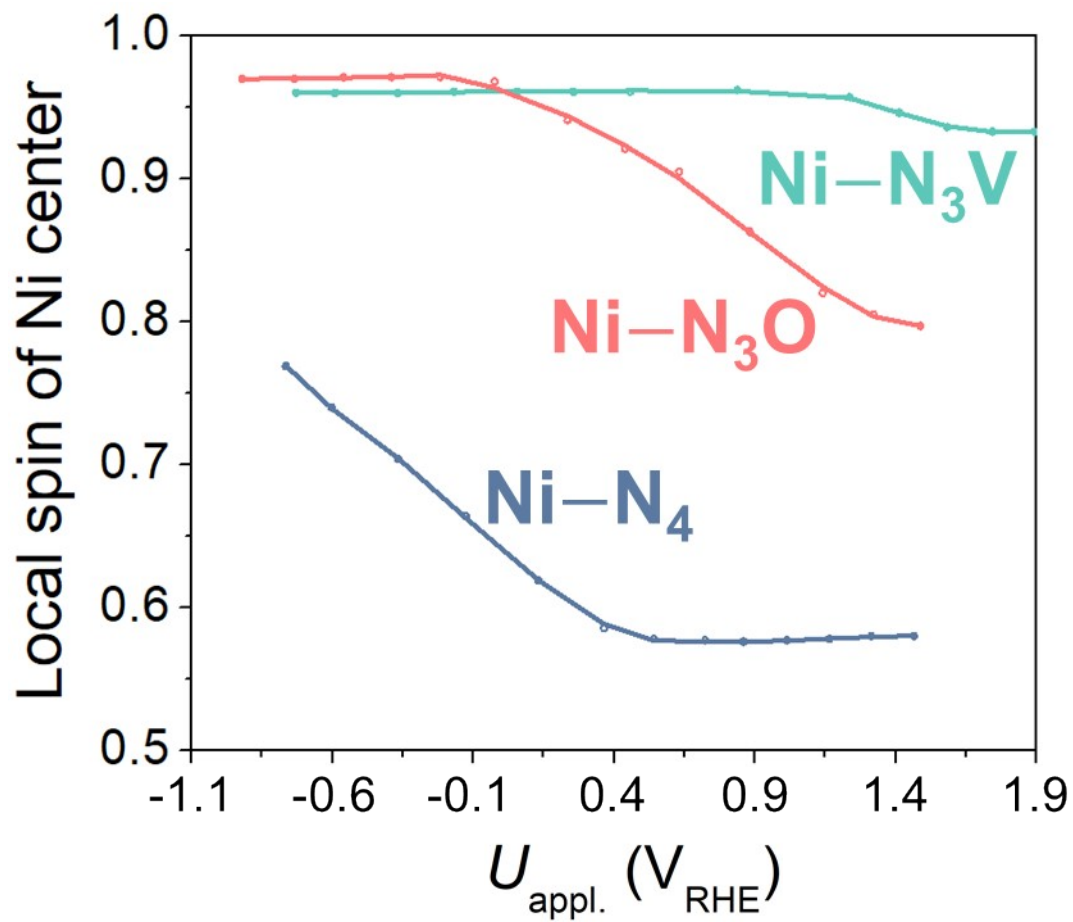

**Fig. S3** Change of local spin ( $S$ ) at the  $\text{Ni}^{1+}$  center for Ni-N<sub>4</sub> (blue), Ni-N<sub>3</sub>O (coral), and Ni-N<sub>3</sub>V (green) systems with RHE (pH = 6.8).

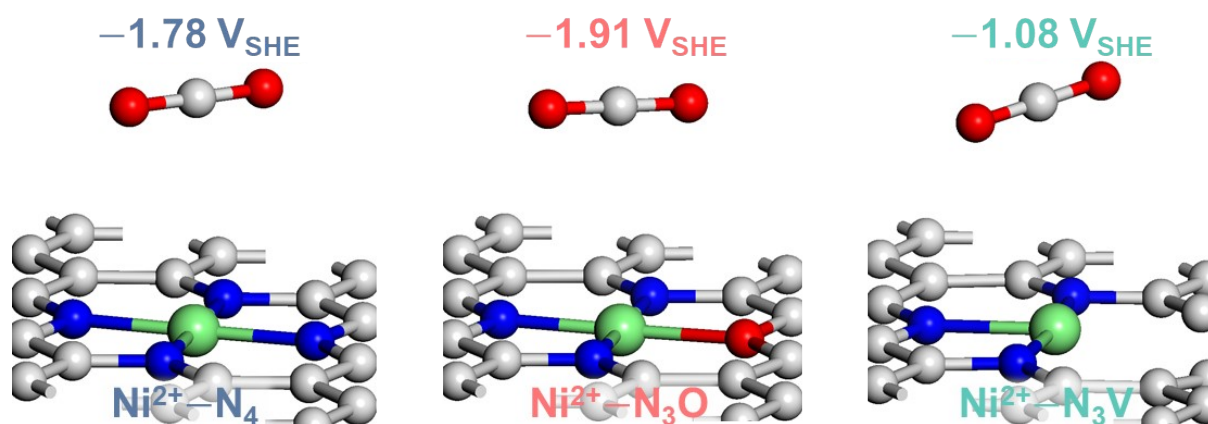

**Fig. S4** DFT-calculated geometry of the CO<sub>2</sub> adsorption step on the Ni<sup>2+</sup> sites. Each simulation cell had an excess charge corresponding to  $-2.0 e$ , and the potentials versus SHE ( $V_{\text{SHE}}$ ) corresponding to the excess charge were specified.

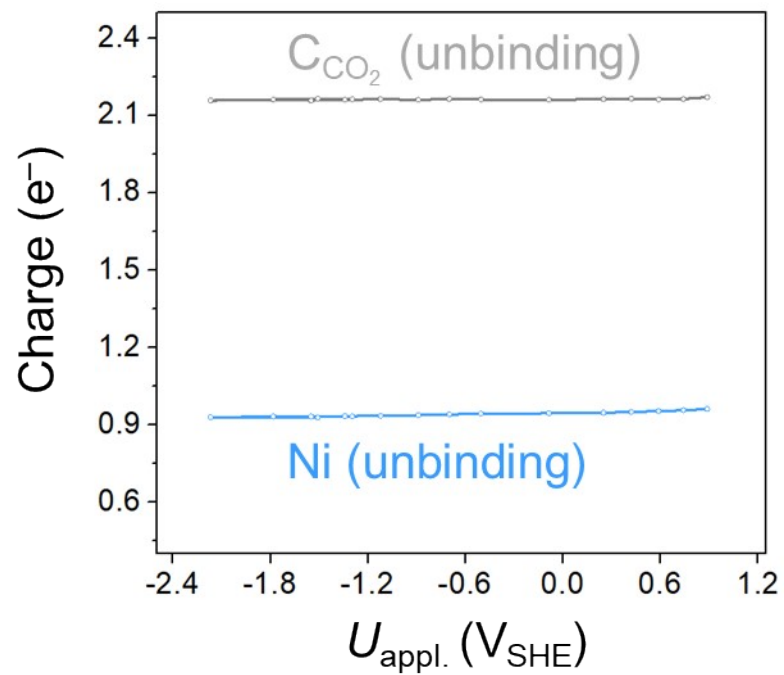

**Fig. S5** Change of partial charges on the Ni center (blue) and C atom of the CO<sub>2</sub> (grey) depending on the applied potential  $U_{\text{appl.}}$ . No charge transfer is observed between Ni<sup>2+</sup> and CO<sub>2</sub>.

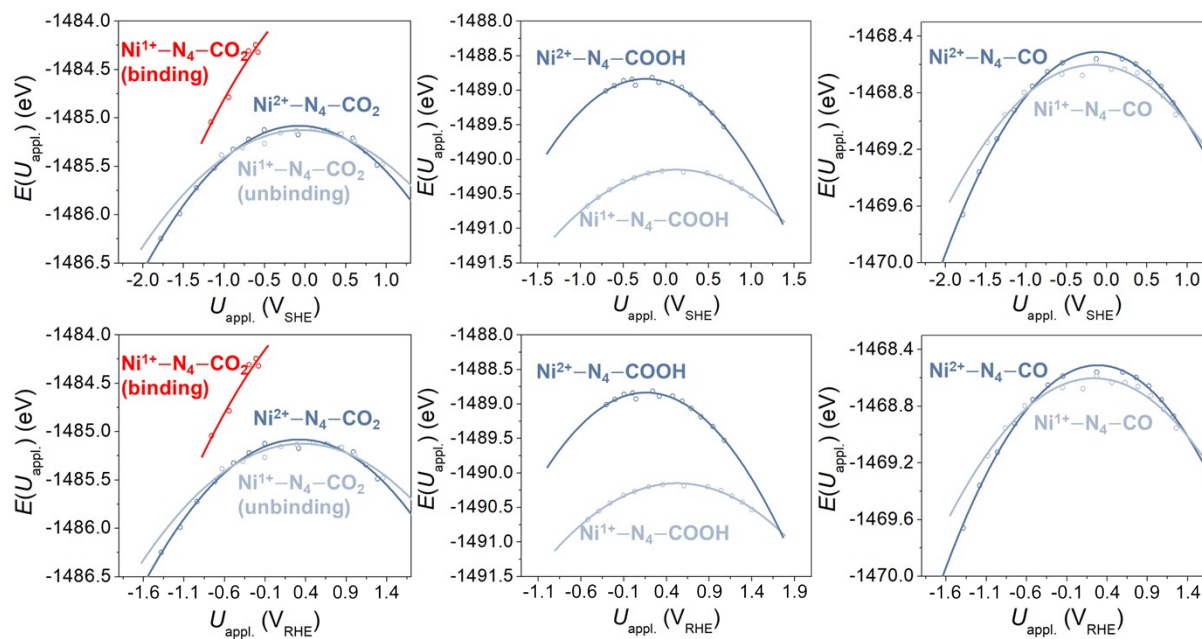

**Fig. S6** Grand-canonical energy profiles versus SHE (first row) and RHE (second row, at pH = 6.8) of the  $\text{CO}_2$ ,  $\text{COOH}$ , and  $\text{CO}$  intermediates adsorbed on the  $\text{Ni-N}_4$  system.

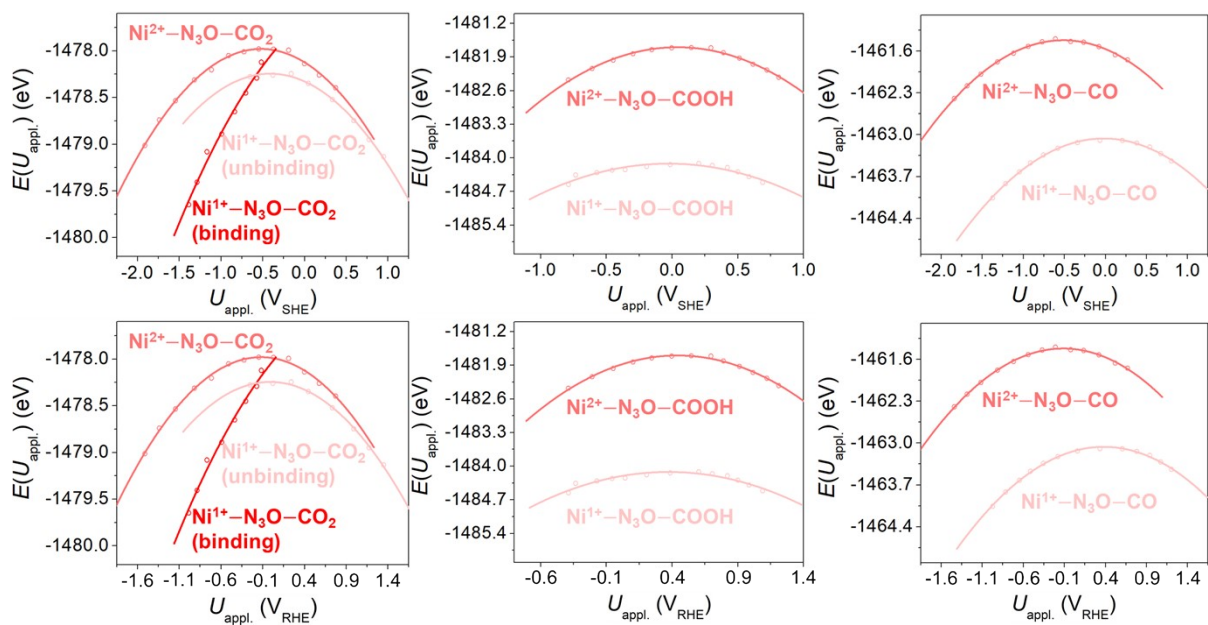

**Fig. S7** Grand-canonical energy profiles versus SHE (first row) and RHE (second row, at pH = 6.8) of the  $\text{CO}_2$ ,  $\text{COOH}$ , and  $\text{CO}$  intermediates adsorbed on the  $\text{Ni}-\text{N}_3\text{O}$  system.



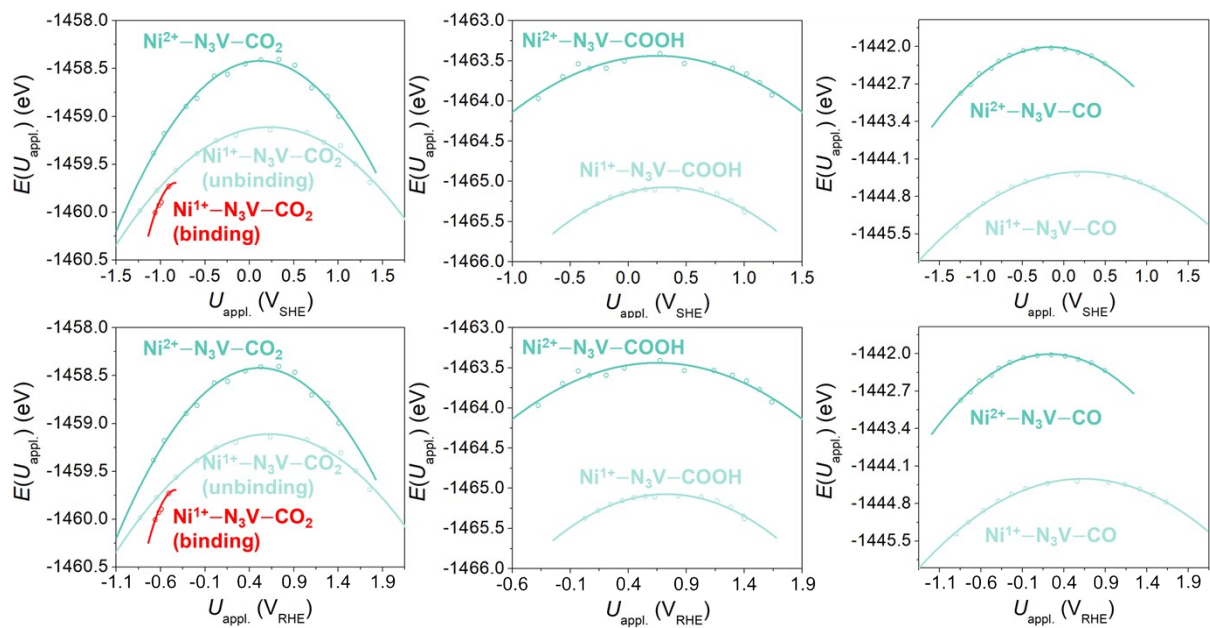

**Fig. S8** Grand-canonical energy profiles versus SHE (first row) and RHE (second row, at pH = 6.8) of the  $\text{CO}_2$ ,  $\text{COOH}$ , and  $\text{CO}$  intermediates adsorbed on the  $\text{Ni-N}_3\text{V}$  system.
